# Supplementary material
Source: publisher figshare collection journal article supplement (https://wiley.figshare.com/articles/dataset/_/3564591)
Supplement: Supplementary file 1 [file 1]

## Appendix A

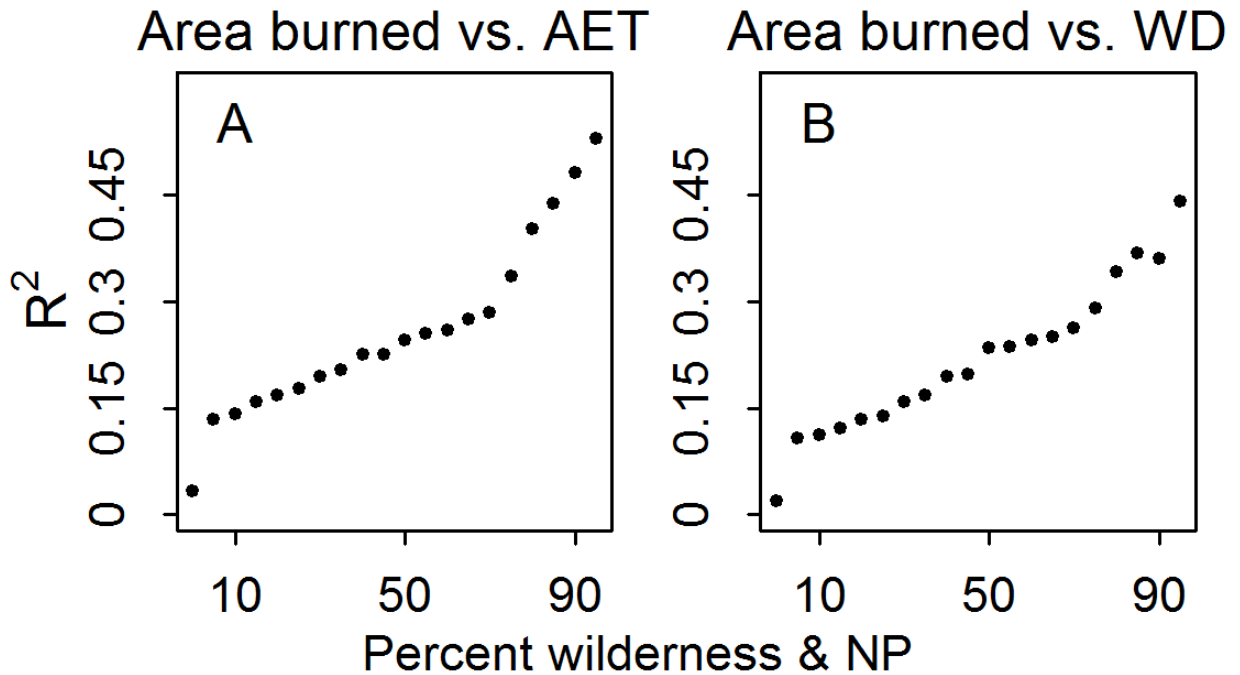

FIG. A1. Strength of the relationship for models of area burned explained by AET (A) and WD (B) as the criteria for inclusion into the model varies along a gradient of percent designated wilderness and national park. The strength of the models increase as samples with low percentage of protected lands are iteratively excluded from the models. AET: actual evapotranspiration; WD: water deficit. Modified from: Parks S. A., M.-A. Parisien, C. Miller, and S. Z. Dobrowski. 2014. Fire activity and severity in the western US vary along proxy gradients representing fuel amount and fuel moisture. Plos One 9(6):e99699.
